# Supplementary material for: CEP55: an immune-related predictive and prognostic molecular biomarker for multiple cancers
Source: Springer Nature journal article supplement (doi:10.1186/s12890-023-02452-1), 2023-05-12
Supplement: MOESM4 [file 12890_2023_2452_MOESM4_ESM.pdf]

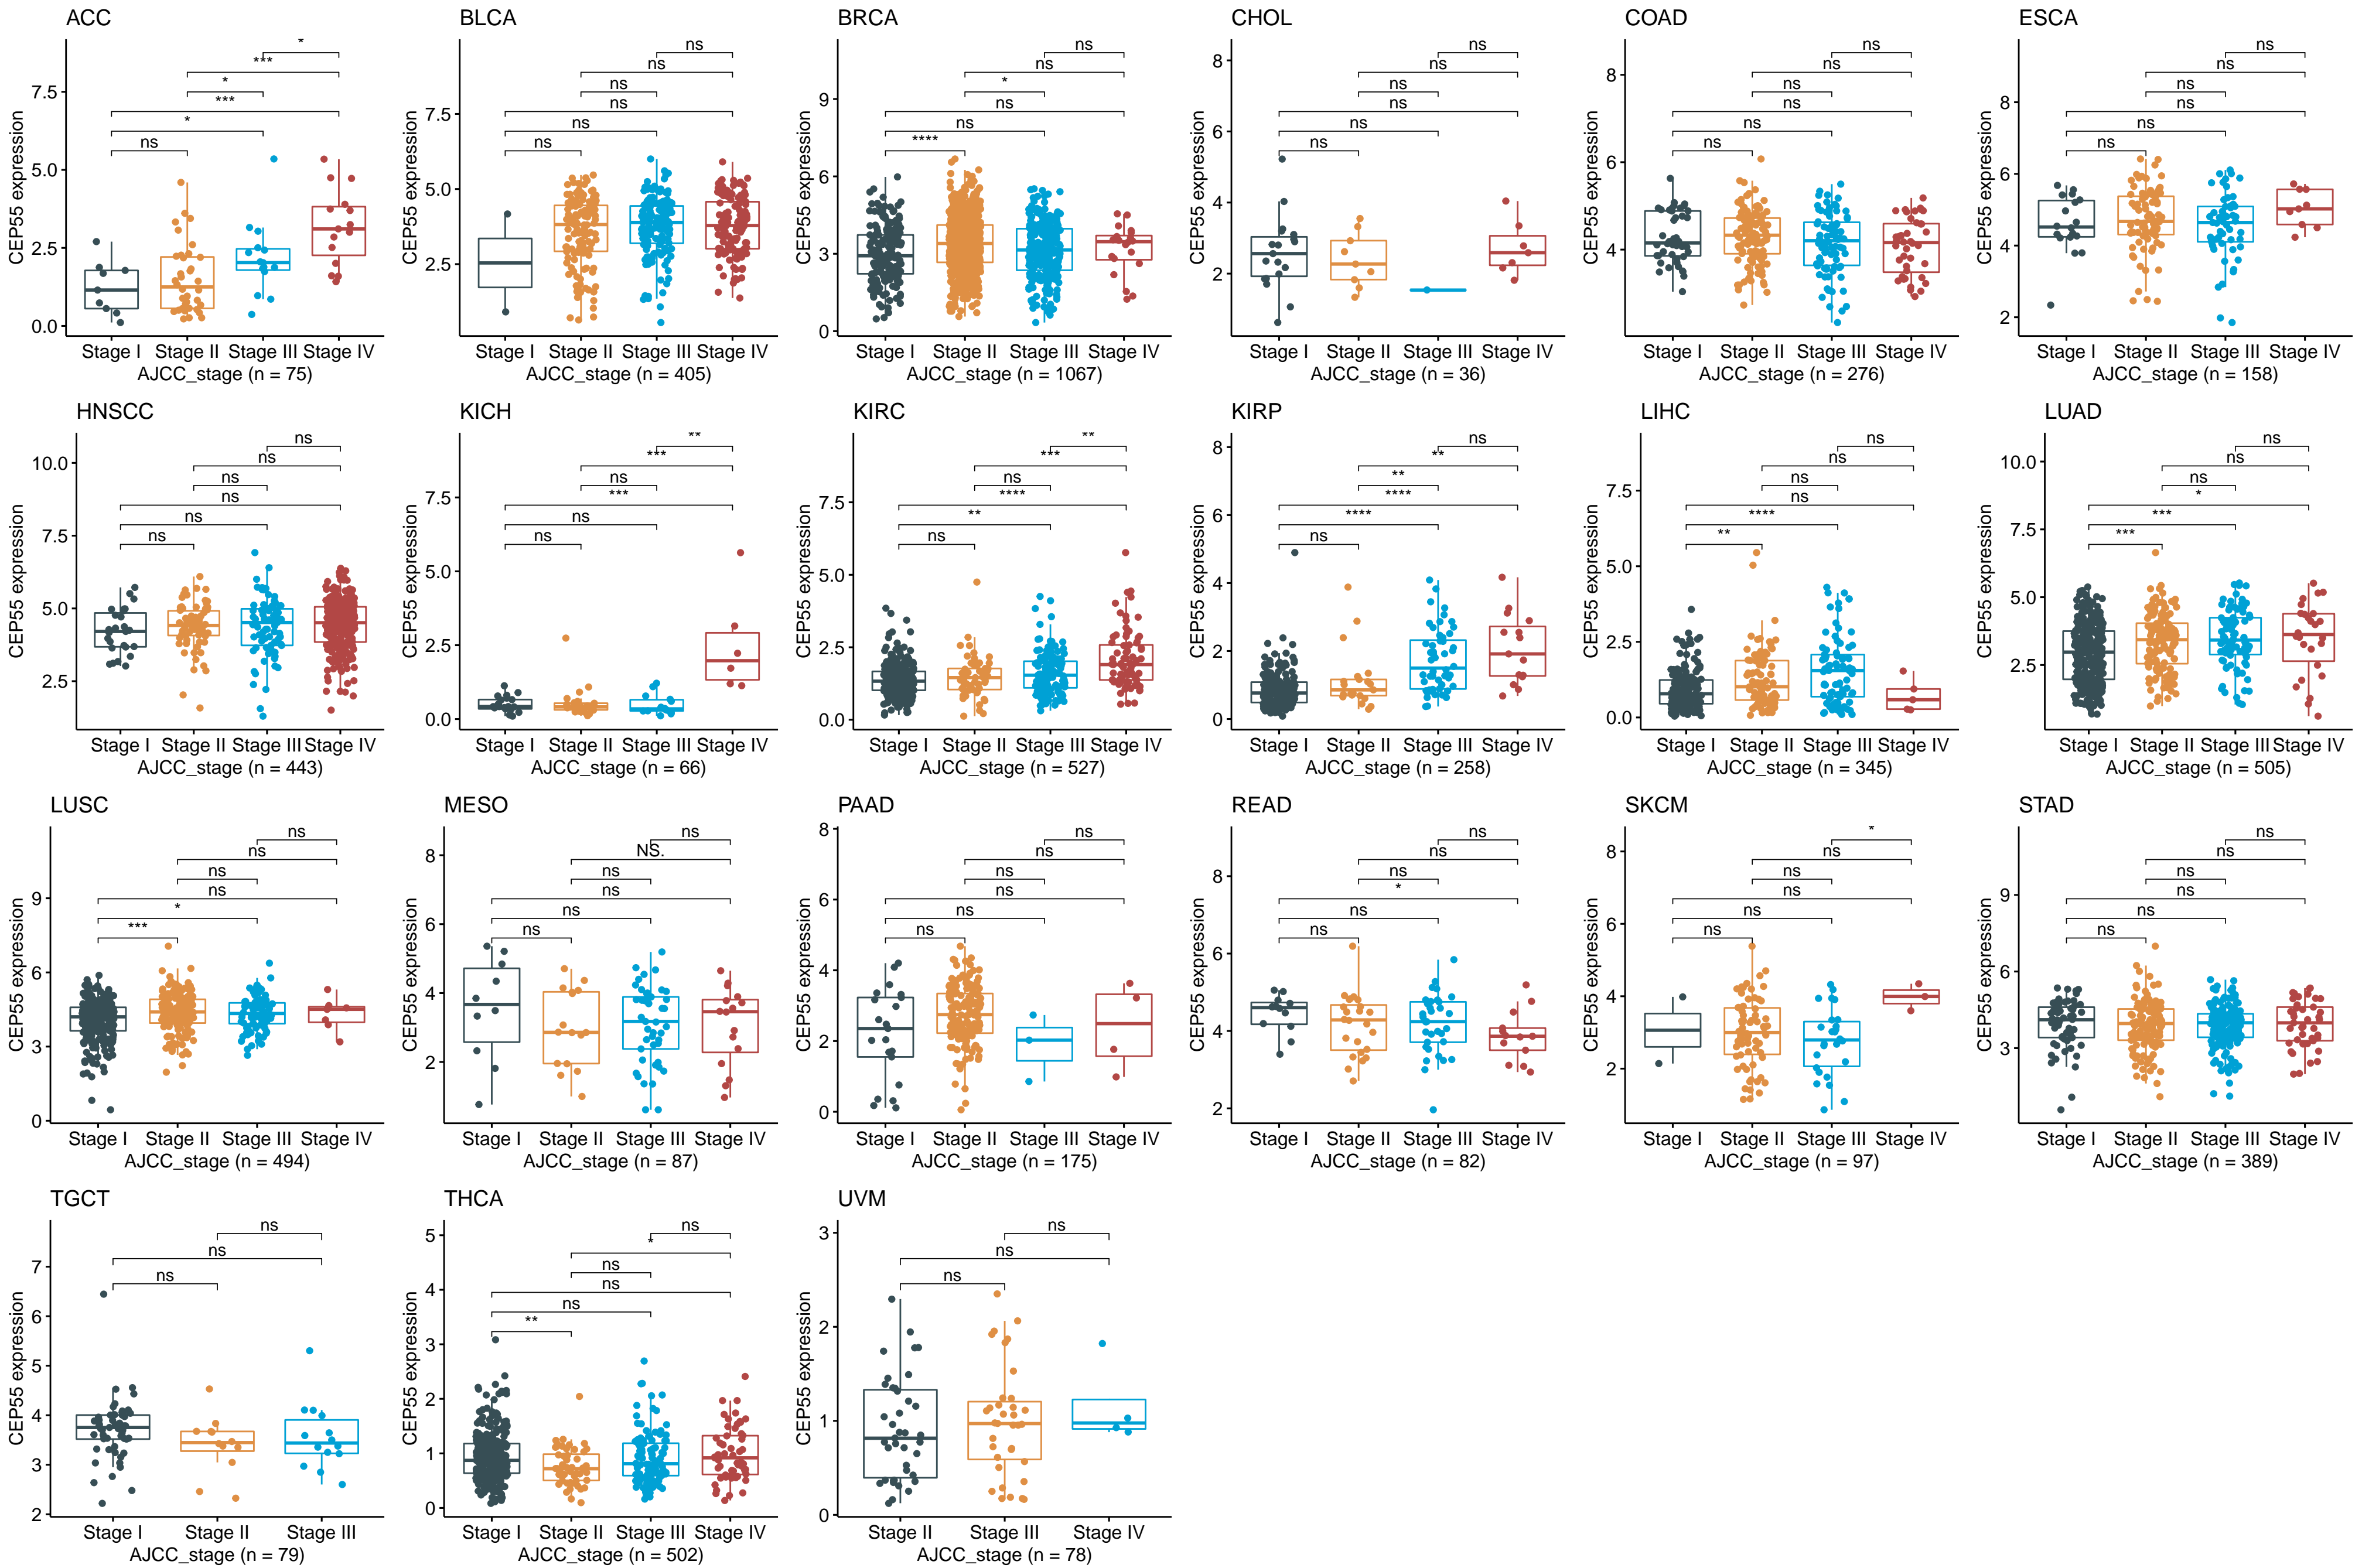

Figure S1. The difference in CEP55 expression between cancer patients of tumor stages.
